# Supplementary material for: Devices and furniture for small and sick newborn care: systematic development of a planning and costing tool
Source: Springer Nature journal article supplement (doi:10.1186/s12887-023-04363-w), 2023-11-15
Supplement: MOESM1 [file 26308070]

## ISPOR CiCERO Checklist:

### Criteria for Cost (-Effectiveness) Review Outcomes For systematic literature reviews that summarize cost and cost-effectiveness outcomes

The ISPOR CiCERO Checklist is a tool to assess the quality and risk of bias in systematic reviews of cost and cost-effectiveness outcomes. Stage six was the only applicable step for the review of the planning and costing tools.

Adapted criteria used to review the tools:

1. Focus on maternal and child health and devices.
2. Calculates cost of scale-up and unit cost e.g., per service and total cost by the level of care.
3. Study perspective
4. Scope of costs; Includes the cost of capital investments.
5. Has default estimates.
6. Country where the tool has been used.
7. Availability of user guide.
8. Publicly available software.

| Stage 6. Presentation and reporting                                                                                                                                                           | Possible answers |
|-----------------------------------------------------------------------------------------------------------------------------------------------------------------------------------------------|------------------|
| <b>Question 11. Were the original studies included in the review described in adequate detail?</b>                                                                                            | Y                |
| <b>Comment:</b><br><i>Answer "NA" for each sub-question of question 11 if no studies were identified.</i>                                                                                     |                  |
| <b>The reviews should report the following points for each of the included studies:</b>                                                                                                       |                  |
| 11.1. Country of studied population                                                                                                                                                           | Y                |
| 11.2. Description of the population of analysis                                                                                                                                               | Y                |
| 11.3. Time horizon, study perspective                                                                                                                                                         | Y                |
| 11.4. Discount rate                                                                                                                                                                           | Y                |
| <b>Comment:</b><br><i>Answer NA if only short-term trials were involved, ie, one-year horizon or less.</i>                                                                                    |                  |
| 11.5. Adjustment of inflation                                                                                                                                                                 | Y                |
| 11.6. Interventions compared                                                                                                                                                                  | NA               |
| <b>Comment:</b><br><i>Answer "NA" if comparing interventions was not an objective of the review (eg, cost-of-illness / burden of disease)</i>                                                 |                  |
| 11.7. Method(s) for valuation of economic outcomes                                                                                                                                            |                  |
| (a) Cost(s) in the healthcare sector according to the horizon of interest (direct costs, capital costs)                                                                                       | Y                |
| (b) Indirect medical costs                                                                                                                                                                    | NA               |
| (c) Costs outside the healthcare sector, such as productivity loss (indirect costs)                                                                                                           | NA               |
| 11.8. Method(s) for valuation of effectiveness outcomes, including source, type of source, estimates, duration (when relevant)                                                                | Y                |
| <b>Comment:</b><br><i>Answer "NA" if assessing cost-effectiveness was not an objective of the review (eg cost-minimization, cost-of-illness / burden of disease or other costs analysis).</i> |                  |
| 11.9. Compliance/adherence with treatment                                                                                                                                                     | NA               |
| <b>Comment:</b><br><i>Answer "NA" if the review has a top-down macro-level approach or if the review analyzes an intervention performed without any follow up.</i>                            |                  |
| 11.10. Decision analytic modelling or approach to calculation of economic outcomes                                                                                                            | NA               |
| <b>Comment:</b><br><i>Answer "NA" if the review includes only within-trial cost or cost-effectiveness studies.</i>                                                                            |                  |

|                                                                                                                                                                            |    |
|----------------------------------------------------------------------------------------------------------------------------------------------------------------------------|----|
| 11.11. Cost outcomes and/or health outcomes, eg, gained life years, number of deaths avoided, or QALY, and outcomes of economic value of an intervention, eg ICER or INHB. | N  |
| 11.12. Uncertainty                                                                                                                                                         | Y  |
| <p><b>Comment:</b><br/> <i>Answer “Yes” if the review reported whether analyses are deterministic or probabilistic or based on other types of simulation.</i></p>          |    |
| 11.13. Conflicts of interest and sources of funding                                                                                                                        | NA |
| 11.14. Software used (R, STATA, SAS, Excel, SPSS etc)                                                                                                                      | Y  |
